# Supplementary material
Source: Springer Nature journal article supplement (https://www.springermedizin.de/resource/supplementary/12889_2006_472_MOESM2_ESM.pdf/9500946)

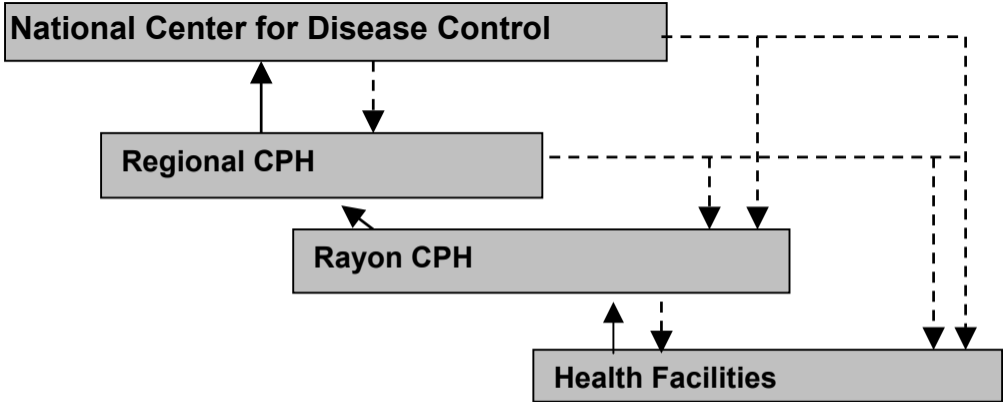

————▶ Data / information reporting

- - - - -▶ Response, feedback, supervision, and evaluation

Supplement: MOESM2 [file 9500946]
